# Supplementary material
Source: bioRxiv or medRxiv preprint supplement (http://www.biorxiv.org/highwire/filestream/35040/field_highwire_adjunct_files/1/047274-2.pdf)
Supplement: Supplementary file [file 047274-2.pdf]

P/D ratio

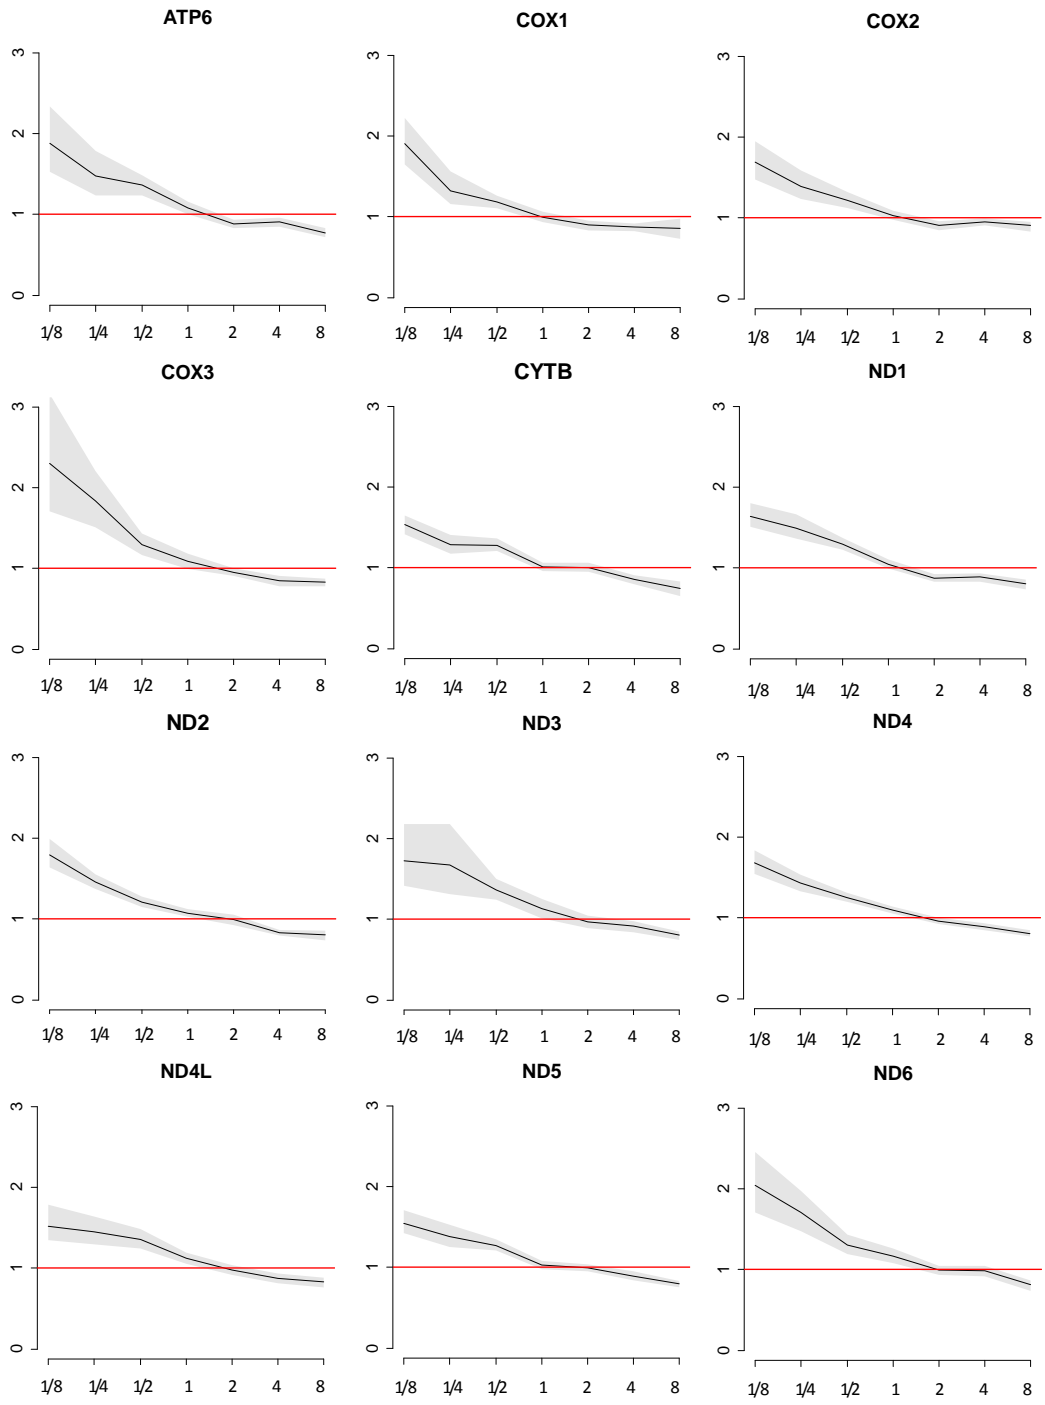

distance
